# Supplementary material for: Comprehensive Investigation on Ginsenosides in Different Parts of a Garden-Cultivated Ginseng Root and Rhizome
Source: PubMed Central journal article supplement (PMC8003075; doi:10.3390/molecules26061696), 2021-03-18
Supplement: molecules-26-01696-s001.pdf [file molecules-26-01696-s001.pdf]

## Supplementary data

Figure S1. High collision energy ESI-MS spectra of peaks 51(A), 54(B), 59(C), 75(D), 80(E), and 83(F).

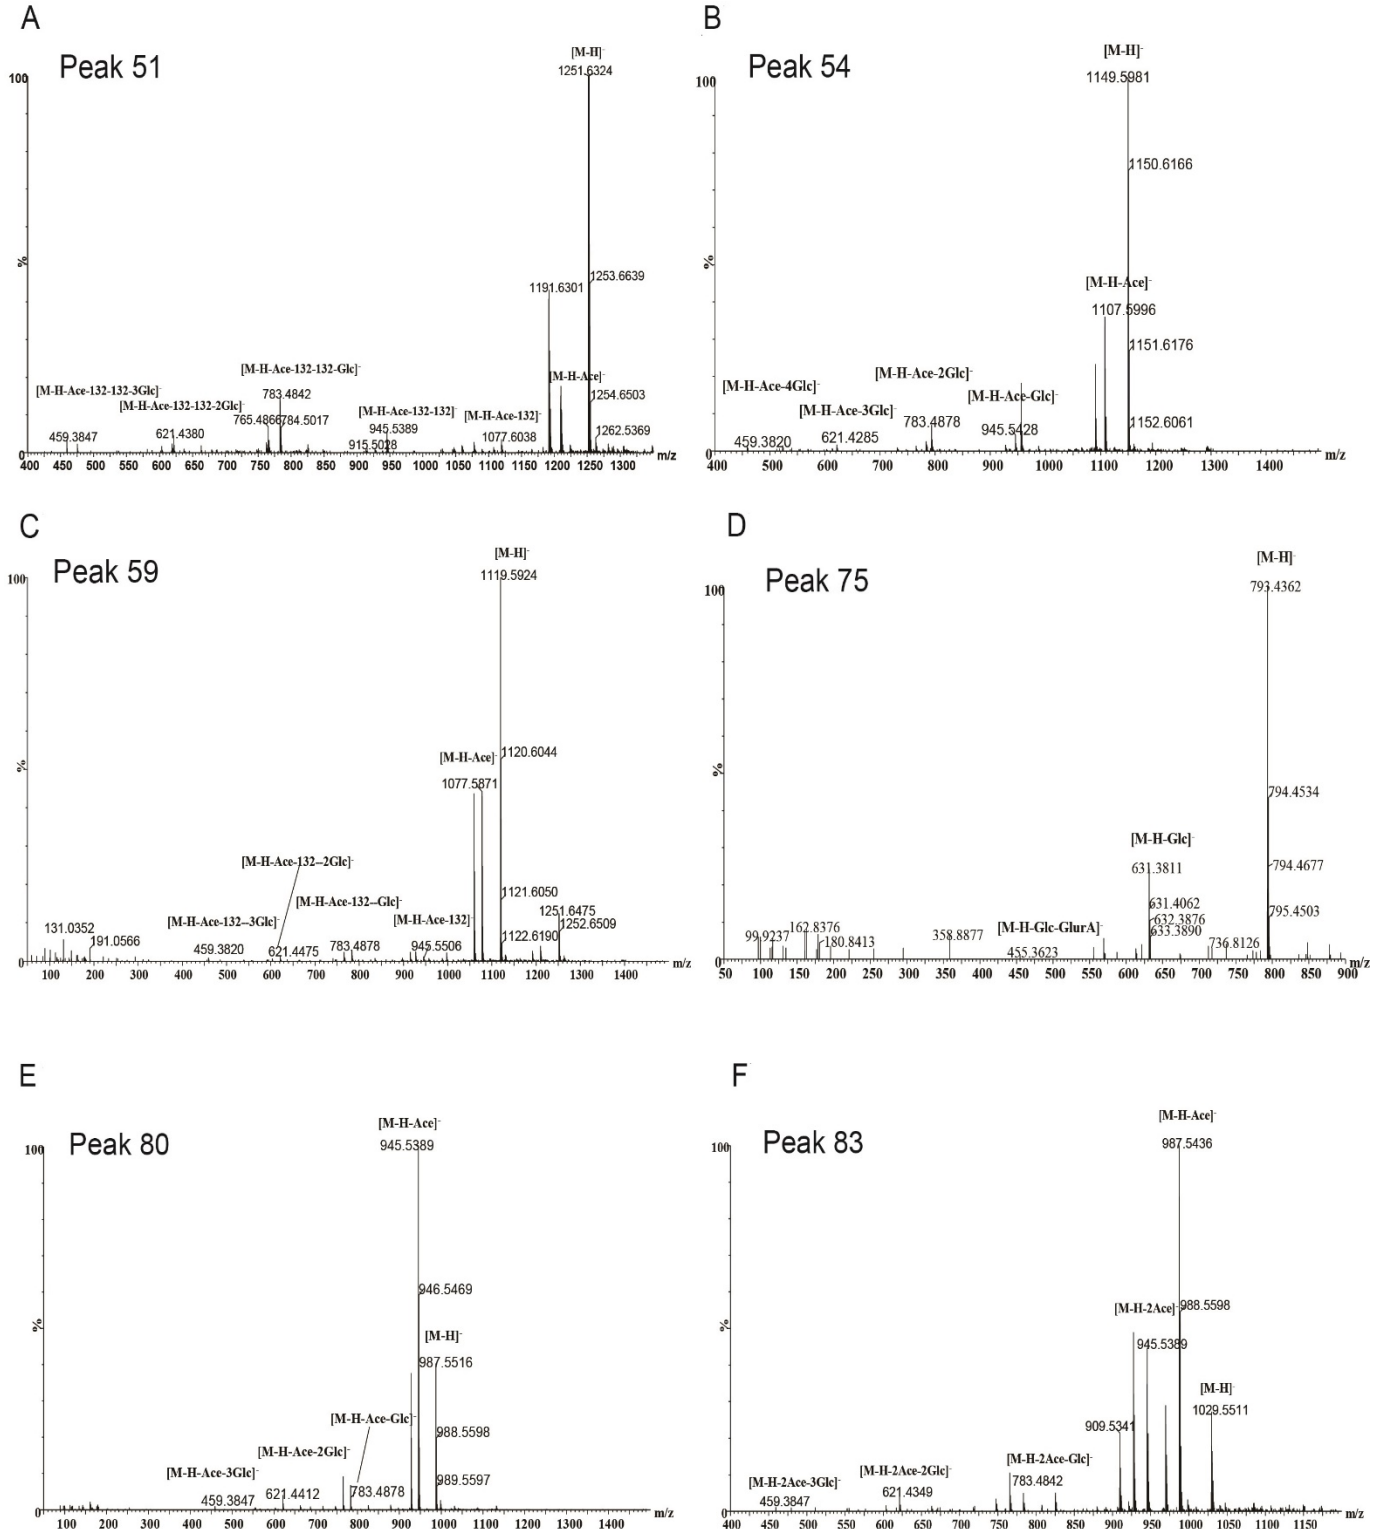

Table S1-1. Chemical structures of the detected compounds in different parts of *P. ginseng* root (PPD-type).

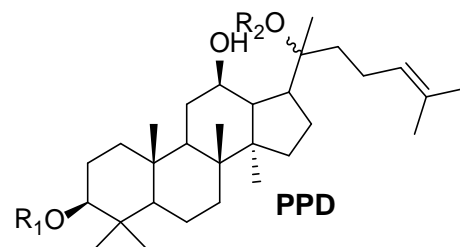

| No                | Name                                                                                                                                                                                                    | R1                           | R2                                      |
|-------------------|---------------------------------------------------------------------------------------------------------------------------------------------------------------------------------------------------------|------------------------------|-----------------------------------------|
| 38/84             | malnoylfloralginsenosides Rd <sub>6</sub>                                                                                                                                                               | Glc(2,1)Glc(6)-Mal           | Glc(6)-Mal                              |
| 38/84             | $\beta$ -D-Glucopyranoside, (3 $\beta$ ,12 $\beta$ )-20-( $\beta$ -D-glucopyranosyloxy)-12-hydroxydammar-24-en-3-yl 2-O-[6-O-(2-carboxyacetyl)- $\beta$ -D-glucopyranosyl]-, 6-(hydrogen propanedioate) | Glc-[6-Mal]-(2,1)Glc-[6-Mal] | Glc                                     |
| 42                | Notoginsenoside R <sub>4</sub>                                                                                                                                                                          | Glc(2,1)Glc                  | Glc(6,1)Glc(3,1)Xyl                     |
| 44/52             | Yesaninoside J                                                                                                                                                                                          | Glc-[6-Ace]-(2,1)Glc         | Glc(6,1)Glc(6,1)Xyl                     |
| 45                | malonyl-ginsenoside Ra <sub>3</sub> / malonyl-notoginsenoside R <sub>4</sub>                                                                                                                            | Glc(2,1)Glc(6)-Mal           | Glc(6,1)Glc(3,1)Xyl/Glc(6,1)Glc(6,1)Xyl |
| 48                | Ginsenoside Ra <sub>2</sub>                                                                                                                                                                             | Glc(2,1)Glc                  | Glc(6,1)Ara( <i>f</i> 2,1) Xyl          |
| 49                | Ginsenoside Ra <sub>3</sub>                                                                                                                                                                             | Glc(2,1)Glc                  | Glc(6,1)Glc(3,1)Xyl                     |
| 50                | Rb <sub>1</sub>                                                                                                                                                                                         | Glc(2,1)Glc                  | Glc(6,1)Glc                             |
| 51/58/66/70/72/73 | Ra <sub>5</sub>                                                                                                                                                                                         | Glc(2,1)Glc(6)-Ace           | Glc(6,1)Ara( <i>p</i> 4,1)Xyl           |

|                          |                                                                                                                                                                                                                                                                       |                      |                               |
|--------------------------|-----------------------------------------------------------------------------------------------------------------------------------------------------------------------------------------------------------------------------------------------------------------------|----------------------|-------------------------------|
| 51/58/66/70/72/73        | (3 $\beta$ ,12 $\beta$ )-3-[[2-O-(6-O-Acetyl- $\beta$ -D-glucopyranosyl)- $\beta$ -D-glucopyranosyl]oxy]-12-hydroxydammar-24-en-20-yl O- $\beta$ -D-xylopyranosyl-(1 $\rightarrow$ 2)-O- $\alpha$ -L-arabinopyranosyl-(1 $\rightarrow$ 6)- $\beta$ -D-glucopyranoside | Glc(2,1)Glc(6)-Ace   | Glc(6,1)Ara( <i>p</i> 2,1)Xyl |
| 56                       | Rc                                                                                                                                                                                                                                                                    | Glc(2,1)Glc          | Glc(6,1)Ara( <i>f</i> )       |
| 57/62                    | Ra <sub>1</sub>                                                                                                                                                                                                                                                       | Glc(2,1)Glc          | Glc(6,1)Ara( <i>p</i> 4,1)Xyl |
| 54/61/64/74              | Quinquenoside R <sub>1</sub>                                                                                                                                                                                                                                          | Glc(2,1)Glc(6)-Ace   | Glc(6,1)Glc                   |
| 54/61/64/74              | (3 $\beta$ ,12 $\beta$ )-20-[[6-O-(6-O-Acetyl- $\beta$ -D-glucopyranosyl)- $\beta$ -D-glucopyranosyl]oxy]-12-hydroxydammar-24-en-3-yl 2-O- $\beta$ -D-glucopyranosyl- $\beta$ -D-glucopyranoside                                                                      | Glc(2,1)Glc          | Glc(6,1)Glc(6)-Ace            |
| 55                       | malonyl-ginsenoside Rb <sub>1</sub>                                                                                                                                                                                                                                   | Glc(2,1)Glc(6)-Mal   | Glc(2,1)Glc                   |
| 60                       | malonyl-ginsenoside Rc                                                                                                                                                                                                                                                | Glc(2,1)Glc(6)-Mal   | Glc(6,1)Ara( <i>f</i> )       |
| 63                       | Rb <sub>2</sub>                                                                                                                                                                                                                                                       | Glc(2,1)Glc          | Glc(6,1)Ara( <i>p</i> )       |
| 65                       | Rb <sub>3</sub>                                                                                                                                                                                                                                                       | Glc(2,1)Glc          | Glc(6,1)Xyl                   |
| 59/67/69/71/76/77/8<br>2 | Rs <sub>1</sub>                                                                                                                                                                                                                                                       | Glc(2,1)Glc(6)-Ace   | Glc(6,1)Ara( <i>p</i> )       |
| 59/67/69/71/76/77/8<br>2 | Rs <sub>2</sub>                                                                                                                                                                                                                                                       | Glc(2,1)Glc(6)-Ace   | Glc(6,1)Ara( <i>f</i> )       |
| 59/67/69/71/76/77/8<br>2 | Pseudoginsenoside F <sub>8</sub>                                                                                                                                                                                                                                      | Glc-[6-Ace]-(2,1)Glc | Glc(6,1)Ara( <i>p</i> )       |
| 68                       | malonyl-ginsenoside Rb <sub>2</sub>                                                                                                                                                                                                                                   | Glc(2,1)Glc(6)-Mal   | Glc(6,1)Ara( <i>p</i> )       |
| 78                       | malonyl-ginsenoside Rb <sub>3</sub>                                                                                                                                                                                                                                   | Glc(2,1)Glc(6)-Mal   | Glc(6,1)Xyl                   |
| 79                       | Rd                                                                                                                                                                                                                                                                    | Glc(2,1)Glc          | Glc                           |

|                |                                                                                                                                                                            |                                           |                         |
|----------------|----------------------------------------------------------------------------------------------------------------------------------------------------------------------------|-------------------------------------------|-------------------------|
| 80/81/86/89/93 | Pseudoginsenoside Rc <sub>1</sub>                                                                                                                                          | Glc(2,1)Glc(6)-Ace                        | Glc                     |
| 80/81/86/89/93 | Quinquenoside III                                                                                                                                                          | Glc-[6-Ace]-(2,1)Glc                      | Glc                     |
| 80/81/86/89/93 | $\beta$ -D-Glucopyranoside, (3 $\beta$ , 12 $\beta$ )-3-( $\beta$ -D-glucopyranosyloxy)-12-hydroxydammar-24-en-20-yl<br>6-O-(6-O-Acetyl- $\beta$ -D-glucopyranosyl)- (9CI) | Glc                                       | Glc(6,1)Glc(6)-Ace      |
| 85             | Gyenoside XVII                                                                                                                                                             | Glc                                       | Glc(6,1)Glc             |
| 87             | Ginsenoside Ra <sub>6</sub> /Quinquenoside II                                                                                                                              | Glc(2,1)Glc(6)-But                        | Glc(6,1)Glc             |
| 88             | malonyl-ginsenoside Rd                                                                                                                                                     | Glc(2,1)Glc(6)-Mal                        | Glc                     |
| 91             | Ginsenoside Ra <sub>7</sub>                                                                                                                                                | Glc(2,1)Glc(6)-But                        | Glc(6,1)Ara( <i>p</i> ) |
| 92             | Gyenoside IX                                                                                                                                                               | Glc                                       | Glc(6,1)Xyl             |
| 94/98          | Ginsenoside Ra <sub>8</sub> /Ginsenoside Ra <sub>9</sub>                                                                                                                   | Glc(2,1)Glc(3)-But/Glc(2,1)Glc(6)-<br>But | Glc(6,1)Ara( <i>f</i> ) |
| 96             | Quinquenoside I                                                                                                                                                            | Glc(2,1)Glc(6)-But                        | Glc                     |
| 97             | (20S)-Ginsenoside Rg <sub>3</sub>                                                                                                                                          | Glc(2,1)Glc                               | H                       |
| 99             | 20(S)-Ginsenoside Rs <sub>3</sub>                                                                                                                                          | Glc(2,1)Glc(6)-Ace                        | H                       |
| 100            | (20R)-Ginsenoside Rg <sub>3</sub>                                                                                                                                          | Glc(2,1)Glc                               | H                       |
| 101            | (20R)-Ginsenoside Rs <sub>3</sub>                                                                                                                                          | Glc(2,1)Glc(6)-Ace                        | H                       |
| 103            | 20(S)-Ginsenoside Rh <sub>2</sub>                                                                                                                                          | Glc                                       | H                       |
| 104            | 20(R)-Ginsenoside Rh <sub>2</sub>                                                                                                                                          | Glc                                       | H                       |

Table S1-2. Chemical structures of the detected compounds in different parts of *P. ginseng* root (PPT-type).

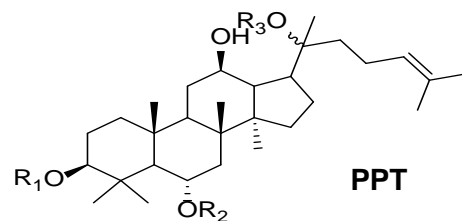

| No             | Name                                    | R1          | R2          | R3                            |
|----------------|-----------------------------------------|-------------|-------------|-------------------------------|
| 7/11/15        | Ginsenoside Re <sub>1</sub>             | H           | Glc         | Glc(3,1)Glc                   |
| 7/11/15        | Ginsenoside Re <sub>2</sub>             | H           | Glc(3,1)Glc | Glc                           |
| 7/11/15        | Ginsenoside Re <sub>3</sub>             | H           | Glc         | Glc(4,1)Glc                   |
| 8/10           | Ginsenoside Re <sub>4</sub>             | H           | Glc         | Glc(6,1)Ara(f)                |
| 9              | 20-O-Glucosylginsenoside Rf             | H           | Glc(2,1)Glc | Glc                           |
| 12/17          | Yesaninoside E                          | H           | Glc(2,1)Rha | Glc(6,1)Glc                   |
| 13             | Floralginsenoside M/Floralginsenoside N | H           | Glc(2,1)Rha | Glc(6,1)Ara(f)/Glc(6,1)Ara(p) |
| 14             | Notoginsenoside R <sub>1</sub>          | H           | Glc(2,1)Xyl | Glc                           |
| 18/27/33/36/37 | Vinaginsenoside R <sub>4</sub>          | Glc(2,1)Glc | H           | Glc                           |
| 18/27/33/36/37 | Notoginsenoside R <sub>3</sub>          | H           | Glc         | Glc(6,1)Glc                   |
| 18/27/33/36/37 | Notoginsenoside R <sub>6</sub>          | Glc         | H           | Glc(6,1)Glc                   |
| 18/27/33/36/37 | Notoginsenoside M                       | H           | Glc(6,1)Glc | Glc                           |
| 18/27/33/36/37 | Notoginsenoside N                       | H           | Glc(4,1)Glc | Glc                           |
| 19             | Rg <sub>1</sub>                         | H           | Glc         | Glc                           |

|          |                                         |             |             |                |
|----------|-----------------------------------------|-------------|-------------|----------------|
| 20       | Re                                      | H           | Glc(2,1)Rha | Glc            |
| 21/23/25 | 6'-O-Acetyl-ginsenoside Rg <sub>1</sub> | H           | Glc(6)-Ace  | Glc            |
| 22/24    | 6'''-O-Acetyl-ginsenoside Re            | H           | Glc(2,1)Rha | Glc(6)-Ace     |
| 28/31    | Floralginsenoside P                     | Glc(2,1)Glc | H           | Glc(6,1)Ara(p) |
| 32/41    | Yesanchinoside D                        | H           | Glc(6)-Ace  | Glc            |
| 39       | Rf                                      | H           | Glc(2,1)Glc | H              |
| 40       | Ginsenoside Re <sub>6</sub>             | H           | Glc         | Glc(6)-But     |
| 40       | Koryoginsenoside R <sub>1</sub>         | H           | Glc(6)-But  | Glc            |
| 43       | Notoginsenoside R <sub>2</sub>          | H           | Glc(2,1)Xyl | H              |
| 46       | Rg <sub>2</sub>                         | H           | Glc(2,1)Rha | H              |
| 47       | 20(R)-Ginsenoside Rh <sub>1</sub>       | H           | Glc         | H              |

Table S1-3. Chemical structures of the detected compounds in different parts of *P. ginseng* root (OA-type).

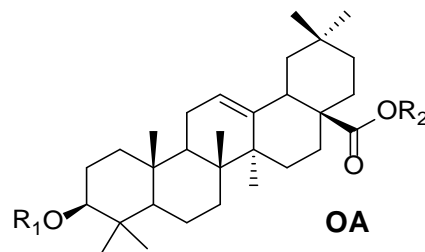

| No    | Name                  | R1            | R2  |
|-------|-----------------------|---------------|-----|
| 53    | Ro                    | GlurA(2,1)Glc | Glc |
| 75/95 | Chikusetsusaponin Iva | GlurA         | Glc |

30

Pseudoginsenoside Rt<sub>1</sub>

GlurA(2,1)Xyl

Glc

Table S1-4. Chemical structures of the detected compounds in different parts of *P. ginseng* root (others).

| No       | Name                               | Molecular structure                                                                                                                                                                                                                                                           |
|----------|------------------------------------|-------------------------------------------------------------------------------------------------------------------------------------------------------------------------------------------------------------------------------------------------------------------------------|
| 1/3/4/34 | Ginsenoside Re <sub>5</sub> isomer | 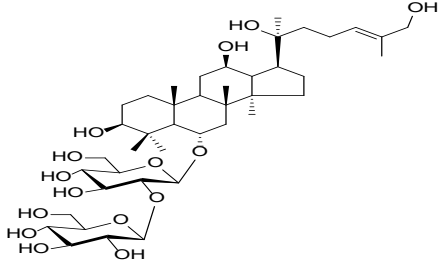 <p>The structure shows a ginsenoside core with a complex sugar chain on the left and a side chain on the right. The side chain includes a double bond and a terminal hydroxyl group.</p>  |
| 5        | Koryoginsenoside R <sub>2</sub>    |  <p>The structure shows a ginsenoside core with a complex sugar chain on the left and a side chain on the right. The side chain includes a double bond and a terminal hydroxyl group.</p> |

5

Ginsenoside V (24 $\beta$ )

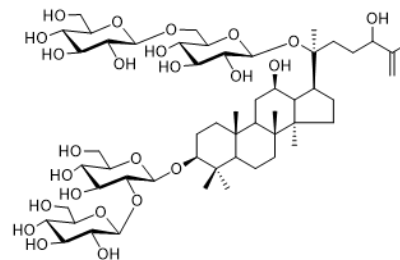

16

Notoginsenoside B

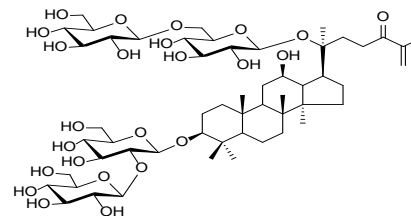

26

Ginsenoside Rg<sub>5</sub>

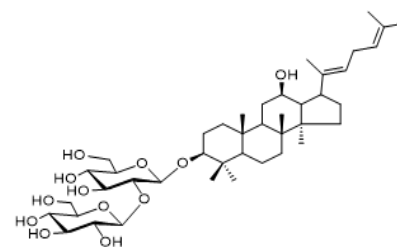

29

Ginsenoside Rs<sub>4</sub>

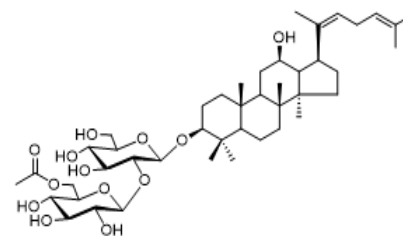



29

Ginsenoside R<sub>S5</sub>

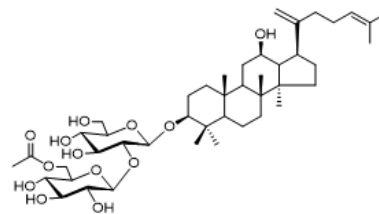

35

12,23-Eproxyginsenoside  
R<sub>G1</sub>

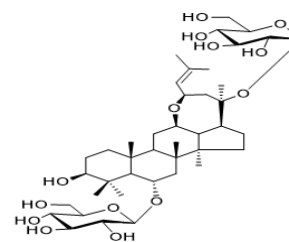

102/105

Ginsenoside R<sub>k1</sub>

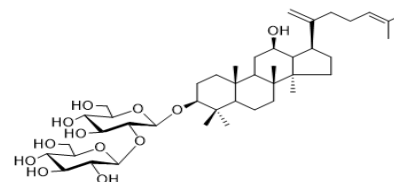

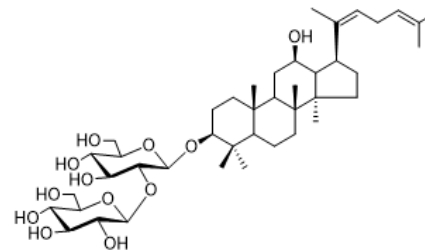Table S2 Detailed information of the tested *P. ginseng* whole root samples.

| Sample number | Source                                                             | Growth year | Collection Time |
|---------------|--------------------------------------------------------------------|-------------|-----------------|
| HLJ-1         | Sanjitai forest farm, Suiling County, Heilongjiang Province, China | 4           | 2019.10–2019.11 |
| HLJ-2         | Sanjitai forest farm, Suiling County, Heilongjiang Province, China | 4           | 2019.10–2019.11 |
| HLJ-3         | Sanjitai forest farm, Suiling County, Heilongjiang Province, China | 4           | 2019.10–2019.11 |
| HLJ-4         | Shuguang forest farm, Tieli City, Heilongjiang Province, China     | 4           | 2019.10–2019.11 |
| HLJ-5         | Shuguang forest farm, Tieli City, Heilongjiang Province, China     | 4           | 2019.10–2019.11 |
| HLJ-6         | Shuguang forest farm, Tieli City, Heilongjiang Province, China     | 4           | 2019.10–2019.11 |
| HLJ-7         | Baoqing County, Shuangyashan City, Heilongjiang Province, China    | 5           | 2019.10–2019.11 |
| HLJ-8         | Baoqing County, Shuangyashan City, Heilongjiang Province, China    | 5           | 2019.10–2019.11 |

|       |                                                                      |   |                 |
|-------|----------------------------------------------------------------------|---|-----------------|
| HLJ-9 | Baoqing County, Shuangyashan City, Heilongjiang Province, China      | 5 | 2019.10–2019.11 |
| JL-1  | Tonghua City, Jilin Province, China                                  | 4 | 2019.10–2019.11 |
| JL-2  | Tonghua City, Jilin Province, China                                  | 4 | 2019.10–2019.11 |
| JL-3  | Tonghua City, Jilin Province, China                                  | 4 | 2019.10–2019.11 |
| JL-4  | Taishang Town, Ji'an City, Jilin Province, China                     | 4 | 2019.10–2019.11 |
| JL-5  | Taishang Town, Ji'an City, Jilin Province, China                     | 4 | 2019.10–2019.11 |
| JL-6  | Taishang Town, Ji'an City, Jilin Province, China                     | 4 | 2019.10–2019.11 |
| JL-7  | Taishang Town, Ji'an City, Jilin Province, China                     | 4 | 2019.10–2019.11 |
| JL-8  | Taishang Town, Ji'an City, Jilin Province, China                     | 4 | 2019.10–2019.11 |
| JL-9  | Taishang Town, Ji'an City, Jilin Province, China                     | 4 | 2019.10–2019.11 |
| JL-10 | Jiayi Village, Qinghe Town, Ji'an City, Jilin Province, China        | 5 | 2019.10–2019.11 |
| JL-11 | Jiayi Village, Qinghe Town, Ji'an City, Jilin Province, China        | 5 | 2019.10–2019.11 |
| JL-12 | Jiayi Village, Qinghe Town, Ji'an City, Jilin Province, China        | 5 | 2019.10–2019.11 |
| JL-13 | Xintuntun Village, Xintun Town, Fusong County, Jilin Province, China | 5 | 2019.10–2019.11 |
| JL-14 | Xintuntun Village, Xintun Town, Fusong County, Jilin Province, China | 5 | 2019.10–2019.11 |

|       |                                                                           |   |                 |
|-------|---------------------------------------------------------------------------|---|-----------------|
| JL-15 | Xintuntun Village, Xintun Town, Fusong County, Jilin Province, China      | 5 | 2019.10–2019.11 |
| JL-16 | Quanyang Town, Fusong County, Jilin Province, China                       | 5 | 2019.10–2019.11 |
| JL-17 | Quanyang Town, Fusong County, Jilin Province, China                       | 5 | 2019.10–2019.11 |
| JL-18 | Quanyang Town, Fusong County, Jilin Province, China                       | 5 | 2019.10–2019.11 |
| LN-1  | Yongling Town, Xinbin County, Fushun City, Liaoning Province, China       | 4 | 2019.10–2019.11 |
| LN-2  | Yongling Town, Xinbin County, Fushun City, Liaoning Province, China       | 4 | 2019.10–2019.11 |
| LN-3  | Yongling Town, Xinbin County, Fushun City, Liaoning Province, China       | 4 | 2019.10–2019.11 |
| LN-4  | Dachuantou Town, Kuandian County, Dandong City, Liaoning Province, China  | 4 | 2019.10–2019.11 |
| LN-5  | Dachuantou Town, Kuandian County, Dandong City, Liaoning Province, China  | 4 | 2019.10–2019.11 |
| LN-6  | Dachuantou Town, Kuandian County, Dandong City, Liaoning Province, China  | 4 | 2019.10–2019.11 |
| LN-7  | Shizhuzi Village, Kuandian County, Dandong City, Liaoning Province, China | 5 | 2019.10–2019.11 |
| LN-8  | Shizhuzi Village, Kuandian County, Dandong City, Liaoning Province, China | 5 | 2019.10–2019.11 |
| LN-9  | Shizhuzi Village, Kuandian County, Dandong City, Liaoning Province, China | 5 | 2019.10–2019.11 |

---
